# Supplementary material
Source: ML conference proceedings conference paper supplement (https://openaccess.thecvf.com/content/CVPR2023/html/Rosu_PermutoSDF_Fast_Multi-View_CVPR_2023_paper.html)
Supplement: Supplementary file 1 [file Rosu_PermutoSDF_Fast_Multi-View_CVPR_2023_supplemental.zip]

Archive with 2 entries (2 files):
- permuto_sdf_supplemental.pdf
- permuto_sdf_video.mp4
